# Supplementary material for: Identification of ISG15 and ZFP36 as novel hypoxia- and immune-related gene signatures contributing to a new perspective for the treatment of prostate cancer by bioinformatics and experimental verification
Source: J Transl Med. 2022 May 10;20:202. doi: 10.1186/s12967-022-03398-4 (PMC9092714; doi:10.1186/s12967-022-03398-4)
Supplement: Supplementary file 1 — Additional file 1: Table S1. High- and low-hypoxia score groups with PCa. [file 12967_2022_3398_MOESM1_ESM.xls]

## Sheet: Table S1 hypoxia.score.cutoff
fullid	DFS_days	DFS_states	Score	hyScore
TCGA-2A-A8VO-01A-11R-A37L-07	1676.4	0	low	0.339102
TCGA-2A-A8VT-01A-11R-A37L-07	1353.3	0	low	0.252559
TCGA-2A-A8VV-01A-11R-A37L-07	661.2	0	low	0.305523
TCGA-2A-A8VX-01A-11R-A37L-07	1358.1	0	low	0.39344
TCGA-2A-AAYF-01A-11R-A41O-07	1344.3	0	low	0.245405
TCGA-2A-AAYO-01A-11R-A41O-07	1253.7	0	low	0.389795
TCGA-2A-AAYU-01A-11R-A41O-07	606	0	low	0.343493
TCGA-CH-5738-01A-11R-1580-07	208.8	0	low	0.465599
TCGA-CH-5739-01A-11R-1580-07	661.2	0	low	0.31832
TCGA-CH-5741-01A-11R-1580-07	389.4	0	low	0.364032
TCGA-CH-5746-01A-11R-1580-07	720.3	0	low	0.33923
TCGA-CH-5748-01A-11R-1580-07	30.6	0	low	0.141365
TCGA-CH-5750-01A-11R-1580-07	390.3	0	low	0.422944
TCGA-CH-5751-01A-11R-1580-07	359.7	1	low	0.47084
TCGA-CH-5752-01A-11R-1580-07	929.4	0	low	0.4483
TCGA-CH-5753-01A-11R-1580-07	30.6	0	low	0.382157
TCGA-CH-5762-01A-11R-1580-07	1319.7	0	low	0.413997
TCGA-CH-5764-01A-21R-1580-07	30.6	0	low	0.273443
TCGA-CH-5765-01A-11R-1580-07	690	0	low	0.164891
TCGA-CH-5766-01A-11R-1580-07	30.6	0	low	0.462914
TCGA-CH-5768-01A-11R-1580-07	720.3	0	low	0.186846
TCGA-CH-5772-01A-11R-1580-07	479.1	0	low	0.279623
TCGA-CH-5790-01A-11R-1580-07	960	0	low	0.143024
TCGA-CH-5791-01A-11R-1580-07	960	1	low	0.198475
TCGA-CH-5792-01A-11R-1580-07	89.7	0	low	0.456775
TCGA-EJ-5494-01A-01R-1580-07	1455.6	0	low	0.478286
TCGA-EJ-5495-01A-01R-1580-07	1734.6	0	low	0.351531
TCGA-EJ-5496-01A-01R-1580-07	586.5	0	low	0.405041
TCGA-EJ-5497-01A-02R-1580-07	399	0	low	0.362718
TCGA-EJ-5498-01A-01R-1580-07	1695	0	low	0.459055
TCGA-EJ-5499-01A-01R-1580-07	1394.4	0	low	0.312798
TCGA-EJ-5502-01A-01R-1580-07	1154.1	0	low	0.358204
TCGA-EJ-5503-01A-01R-1580-07	1371	0	low	0.47506
TCGA-EJ-5504-01A-01R-1580-07	1406.4	0	low	0.340064
TCGA-EJ-5505-01A-01R-1580-07	908.7	0	low	0.107701
TCGA-EJ-5506-01A-01R-1580-07	1361.1	0	low	0.304203
TCGA-EJ-5507-01A-01R-1580-07	1435.8	0	low	0.323779
TCGA-EJ-5508-01A-02R-1580-07	1936.5	0	low	0.269138
TCGA-EJ-5509-01A-01R-1580-07	1442.7	0	low	0.416607
TCGA-EJ-5511-01A-01R-1580-07	1454.7	0	low	0.269515
TCGA-EJ-5512-01A-01R-1580-07	1707.9	0	low	0.328484
TCGA-EJ-5514-01A-01R-1580-07	1802.7	0	low	0.482549
TCGA-EJ-5515-01A-01R-1580-07	1805.4	0	low	0.404921
TCGA-EJ-5516-01A-01R-1580-07	1861.8	0	low	0.239017
TCGA-EJ-5517-01A-01R-1580-07	1861.8	0	low	0.431168
TCGA-EJ-5522-01A-01R-1580-07	2049	0	low	0.190964
TCGA-EJ-5524-01A-01R-1580-07	261.3	1	low	0.454766
TCGA-EJ-5525-01A-01R-1580-07	538.2	1	low	0.381508
TCGA-EJ-5526-01A-01R-1580-07	1881.3	1	low	0.232253
TCGA-EJ-5527-01A-01R-1580-07	1752.3	0	low	0.266588
TCGA-EJ-5530-01A-01R-1580-07	1805.4	0	low	0.195971
TCGA-EJ-5531-01A-01R-1580-07	1254.6	0	low	0.385738
TCGA-EJ-5532-01A-01R-1580-07	1801.5	0	low	0.386602
TCGA-EJ-5542-01A-01R-1580-07	1491	0	low	0.0735793
TCGA-EJ-7115-01A-11R-2118-07	2648.1	0	low	0.360257
TCGA-EJ-7123-01A-11R-1965-07	2534.7	0	low	0.437125
TCGA-EJ-7315-01A-31R-2118-07	993.3	0	low	0.368217
TCGA-EJ-7317-01A-31R-2118-07	759.9	0	low	0.423226
TCGA-EJ-7321-01A-31R-2263-07	812.1	0	low	0.34104
TCGA-EJ-7327-01A-11R-2118-07	909.6	0	low	0.273188
TCGA-EJ-7328-01A-31R-2118-07	829.8	0	low	0.315099
TCGA-EJ-7331-01A-11R-2118-07	731.4	0	low	0.277088
TCGA-EJ-7781-01A-11R-2118-07	1057.5	0	low	0.184118
TCGA-EJ-7782-01A-11R-2118-07	1150.2	0	low	0.40436
TCGA-EJ-7783-01A-11R-2118-07	775.5	0	low	0.354511
TCGA-EJ-7784-01A-11R-2118-07	769.8	0	low	0.101705
TCGA-EJ-7785-01A-11R-2118-07	1160.1	0	low	0.288782
TCGA-EJ-7786-01A-11R-2118-07	1080.3	0	low	0.28884
TCGA-EJ-7788-01A-11R-2118-07	846.6	0	low	0.261079
TCGA-EJ-7789-01A-11R-2118-07	1089	0	low	0.480235
TCGA-EJ-7792-01A-11R-2118-07	1375.8	0	low	0.340064
TCGA-EJ-7793-01A-31R-2263-07	112.5	0	low	0.427273
TCGA-EJ-7794-01A-11R-2118-07	1287	0	low	0.332588
TCGA-EJ-7797-01A-11R-2263-07	968.7	0	low	0.465953
TCGA-EJ-8468-01A-21R-2403-07	2313	0	low	0.43719
TCGA-EJ-8469-01A-11R-2403-07	1897.2	1	low	0.443025
TCGA-EJ-8470-01A-11R-2403-07	1142.1	0	low	0.421418
TCGA-EJ-8472-01A-11R-2403-07	193.2	1	low	0.38389
TCGA-EJ-8474-01A-11R-2403-07	754.8	0	low	0.304472
TCGA-EJ-A46B-01A-31R-A250-07	647.4	0	low	0.408304
TCGA-EJ-A46D-01A-21R-A32Y-07	617.1	0	low	0.420945
TCGA-EJ-A46G-01A-31R-A26U-07	658.2	0	low	0.431096
TCGA-EJ-A46I-01A-12R-A26U-07	658.2	0	low	0.382646
TCGA-EJ-A65E-01A-11R-A29R-07	411	0	low	0.431147
TCGA-EJ-A65F-01A-21R-A311-07	73.8	1	low	0.388374
TCGA-EJ-A65G-01A-21R-A29R-07	656.4	0	low	0.252434
TCGA-EJ-A65J-01A-11R-A311-07	444.6	0	low	0.231553
TCGA-EJ-A6RC-01A-11R-A32O-07	860.4	0	low	0.32393
TCGA-EJ-A7NF-01A-11R-A33R-07	246.3	0	low	0.417534
TCGA-EJ-A7NH-01A-12R-A33R-07	467.1	0	low	0.364139
TCGA-EJ-A7NJ-01A-22R-A352-07	194.1	0	low	0.318042
TCGA-EJ-A7NM-01A-21R-A33R-07	126	0	low	0.42681
TCGA-EJ-A7NN-01A-11R-A33R-07	194.1	1	low	0.3986
TCGA-EJ-A8FN-01A-11R-A352-07	324.3	0	low	0.289603
TCGA-EJ-A8FP-01A-21R-A36G-07	115.2	1	low	0.466302
TCGA-EJ-A8FS-01A-11R-A352-07	213	1	low	0.223402
TCGA-EJ-AB20-01A-12R-A41O-07	129	0	low	0.403103
TCGA-FC-7961-01A-11R-A29R-07	462.3	0	low	0.475425
TCGA-FC-A66V-01A-21R-A30B-07	516.3	0	low	0.455272
TCGA-FC-A8O0-01A-41R-A37L-07	607.2	0	low	0.178993
TCGA-G9-6332-01A-11R-1789-07	1266.3	1	low	0.274945
TCGA-G9-6338-01A-12R-1965-07	1998.6	0	low	0.475591
TCGA-G9-6347-01A-11R-A31N-07	2058.9	0	low	0.44852
TCGA-G9-6351-01A-21R-1965-07	2018.4	0	low	0.440916
TCGA-G9-6354-01A-11R-A311-07	2036.1	0	low	0.472766
TCGA-G9-6356-01A-11R-1789-07	1413.3	0	low	0.366637
TCGA-G9-6361-01A-21R-1965-07	1394.4	0	low	0.293006
TCGA-G9-6362-01A-11R-1789-07	1422	0	low	0.477407
TCGA-G9-6363-01A-21R-1789-07	1358.1	0	low	0.455487
TCGA-G9-6364-01A-21R-1789-07	1180.8	0	low	0.380288
TCGA-G9-6365-01A-11R-1789-07	1343.4	0	low	0.301844
TCGA-G9-6366-01A-11R-2118-07	1918.8	0	low	0.450491
TCGA-G9-6370-01A-11R-1789-07	1139.4	0	low	0.47773
TCGA-G9-6371-01A-11R-1789-07	1208.4	0	low	0.455744
TCGA-G9-6378-01A-11R-1789-07	1138.2	0	low	0.446924
TCGA-G9-6385-01A-11R-1789-07	818.1	0	low	0.455002
TCGA-G9-6498-01A-12R-A311-07	1322.7	1	low	0.479785
TCGA-G9-7509-01A-11R-A41O-07	1586.7	0	low	0.483004
TCGA-G9-7525-01A-31R-2263-07	979.5	0	low	0.291673
TCGA-G9-A9S7-01A-11R-A41O-07	717.6	0	low	0.347703
TCGA-H9-7775-01A-11R-2118-07	182.4	0	low	0.24601
TCGA-H9-A6BX-01A-31R-A311-07	927.3	0	low	0.470451
TCGA-H9-A6BY-01A-11R-A30B-07	110.4	0	low	0.451493
TCGA-HC-7075-01A-11R-1965-07	592.2	0	low	0.363575
TCGA-HC-7077-01A-11R-1965-07	2084.4	0	low	0.404441
TCGA-HC-7078-01A-11R-2118-07	1956.3	0	low	0.404001
TCGA-HC-7079-01A-11R-1965-07	374.4	1	low	0.373164
TCGA-HC-7080-01A-11R-1965-07	881.1	1	low	0.479393
TCGA-HC-7081-01A-11R-1965-07	1119.6	0	low	0.479262
TCGA-HC-7212-01A-11R-2118-07	857.4	0	low	0.431947
TCGA-HC-7231-01A-11R-2118-07	925.5	0	low	0.295485
TCGA-HC-7232-01A-11R-2118-07	754.8	1	low	0.402565
TCGA-HC-7233-01A-11R-2118-07	1335.3	0	low	0.414211
TCGA-HC-7738-01A-11R-2118-07	414	1	low	0.451311
TCGA-HC-7744-01A-11R-2118-07	523.2	0	low	0.318463
TCGA-HC-7745-01A-11R-2118-07	710.7	0	low	0.440262
TCGA-HC-7747-01A-11R-2118-07	737.1	0	low	0.38458
TCGA-HC-7748-01A-11R-2118-07	780.6	0	low	0.471238
TCGA-HC-7749-01A-11R-2118-07	713.4	0	low	0.19814
TCGA-HC-7752-01A-11R-2118-07	770.7	0	low	0.0494505
TCGA-HC-7820-01A-11R-2118-07	736.2	0	low	0.325366
TCGA-HC-7821-01A-12R-2118-07	942.3	0	low	0.398698
TCGA-HC-8213-01A-11R-A29R-07	580.5	0	low	0.266203
TCGA-HC-8256-01A-11R-2263-07	847.5	0	low	0.330685
TCGA-HC-8257-01A-11R-2263-07	715.5	0	low	0.292885
TCGA-HC-8258-01A-11R-2263-07	834.9	0	low	0.459384
TCGA-HC-8259-01A-11R-2263-07	910.5	0	low	0.353344
TCGA-HC-8260-01A-11R-2263-07	676.2	0	low	0.336485
TCGA-HC-8261-01A-11R-2263-07	538.2	0	low	0.432095
TCGA-HC-8262-01A-11R-2263-07	669.3	0	low	0.393846
TCGA-HC-8265-01A-11R-2263-07	476.1	0	low	0.407166
TCGA-HC-8266-01A-11R-2263-07	466.2	0	low	0.3137
TCGA-HC-A48F-01A-11R-A250-07	670.2	0	low	0.378814
TCGA-HC-A4ZV-01A-11R-A26U-07	22.8	0	low	0.348505
TCGA-HC-A632-01A-11R-A29R-07	60	0	low	0.0746373
TCGA-HC-A6AN-01A-11R-A30B-07	48.3	0	low	0.408296
TCGA-HC-A6AP-01A-11R-A30B-07	69.9	0	low	0.480112
TCGA-HC-A6AQ-01A-11R-A30B-07	104.4	0	low	0.467878
TCGA-HC-A6HY-01A-11R-A31N-07	132	0	low	0.48152
TCGA-HC-A76W-01A-11R-A33R-07	210	0	low	0.243703
TCGA-HC-A76X-01A-11R-A33R-07	147.9	0	low	0.339143
TCGA-HC-A8CY-01A-11R-A36G-07	285.9	0	low	0.100699
TCGA-HC-A8D0-01A-11R-A36G-07	763.8	0	low	0.455819
TCGA-HC-A9TE-01A-11R-A41O-07	213	1	low	0.443939
TCGA-HI-7169-01A-11R-2118-07	2645.1	0	low	0.451548
TCGA-J4-8198-01A-11R-2263-07	605.1	0	low	0.352429
TCGA-J4-8200-01A-11R-A29R-07	1200.3	0	low	0.462843
TCGA-J4-A67K-01A-21R-A30B-07	989.4	0	low	0.447661
TCGA-J4-A67M-01A-11R-A30B-07	927.3	0	low	0.455932
TCGA-J4-A67Q-01A-21R-A30B-07	960.9	0	low	0.352391
TCGA-J4-A67S-01A-11R-A30B-07	697.8	1	low	0.453288
TCGA-J4-A6G1-01A-11R-A311-07	757.8	0	low	0.470845
TCGA-J4-A6M7-01A-11R-A31N-07	504.6	0	low	0.313456
TCGA-J4-A83I-01A-11R-A36G-07	675	0	low	0.349245
TCGA-J4-A83J-01A-11R-A36G-07	685.8	0	low	0.482056
TCGA-J9-A52D-01A-11R-A29R-07	208.8	0	low	0.197109
TCGA-J9-A8CL-01A-11R-A352-07	130.2	1	low	0.441561
TCGA-J9-A8CM-01A-11R-A352-07	339	1	low	0.453623
TCGA-KC-A4BV-01A-31R-A26U-07	1308.9	1	low	0.309875
TCGA-KC-A7F6-01A-11R-A33R-07	259.2	0	low	0.456712
TCGA-KC-A7FD-01A-11R-A33R-07	266.1	0	low	0.44413
TCGA-KC-A7FE-01A-12R-A33R-07	346.8	0	low	0.482359
TCGA-KK-A59V-01A-11R-A29R-07	3390.3	0	low	0.267022
TCGA-KK-A59Y-01A-11R-A26U-07	1939.5	0	low	0.363644
TCGA-KK-A59Z-01A-12R-A26U-07	2589.9	0	low	0.409686
TCGA-KK-A5A1-01A-11R-A29R-07	200.1	1	low	0.421011
TCGA-KK-A6DY-01A-12R-A311-07	4233	0	low	0.43429
TCGA-KK-A6E2-01A-11R-A311-07	4951.5	0	low	0.263859
TCGA-KK-A6E8-01A-11R-A31N-07	1744.5	0	low	0.460441
TCGA-KK-A7AP-01A-12R-A33R-07	193.2	0	low	0.391653
TCGA-KK-A7AQ-01A-11R-A33R-07	1199.4	1	low	0.424964
TCGA-KK-A7AV-01A-11R-A32O-07	810	0	low	0.474211
TCGA-KK-A7AW-01A-11R-A32O-07	1038.9	0	low	0.479555
TCGA-KK-A7AZ-01A-12R-A32O-07	1497	0	low	0.316756
TCGA-KK-A7B0-01A-11R-A32O-07	597.3	1	low	0.416115
TCGA-KK-A8I6-01A-11R-A36G-07	658.2	0	low	0.24366
TCGA-KK-A8I8-01A-11R-A36G-07	953.1	0	low	0.412108
TCGA-KK-A8IA-01A-11R-A36G-07	1903.2	0	low	0.390323
TCGA-KK-A8IF-01A-11R-A36G-07	638.7	1	low	0.180008
TCGA-KK-A8IG-01A-11R-A36G-07	2468.7	0	low	0.477244
TCGA-KK-A8IH-01A-11R-A36G-07	1983.9	0	low	0.300064
TCGA-KK-A8IK-01A-11R-A36G-07	2022.3	0	low	0.184879
TCGA-KK-A8IM-01A-11R-A36G-07	1887.3	0	low	0.362828
TCGA-M7-A71Y-01A-22R-A32O-07	486	0	low	0.4815
TCGA-QU-A6IN-01A-11R-A31N-07	4202.4	0	low	0.464379
TCGA-QU-A6IP-01A-11R-A31N-07	2582.1	0	low	0.480638
TCGA-TK-A8OK-01A-22R-A36G-07	26.7	0	low	0.457326
TCGA-TP-A8TT-01A-12R-A41O-07	518.4	0	low	0.233117
TCGA-TP-A8TV-01A-11R-A41O-07	601.2	0	low	0.417558
TCGA-V1-A8MF-01A-11R-A36G-07	1428	0	low	0.48362
TCGA-V1-A8MM-01A-11R-A37L-07	975.6	1	low	0.329899
TCGA-V1-A8MU-01A-11R-A37L-07	1848.9	0	low	0.442157
TCGA-V1-A8WN-01A-11R-A37L-07	910.5	0	low	0.4681
TCGA-V1-A8WS-01A-11R-A37L-07	467.1	0	low	0.238399
TCGA-V1-A8WV-01A-11R-A37L-07	676.2	0	low	0.344856
TCGA-V1-A8X3-01A-11R-A37L-07	199.2	0	low	0.473446
TCGA-V1-A9O9-01A-11R-A41O-07	2828.4	0	low	0.409386
TCGA-V1-A9OA-01A-11R-A41O-07	626.7	0	low	0.252991
TCGA-V1-A9OF-01A-11R-A41O-07	1167	0	low	0.0786128
TCGA-V1-A9OQ-01A-11R-A41O-07	365.7	0	low	0.402983
TCGA-V1-A9OT-01A-11R-A41O-07	287.7	1	low	0
TCGA-V1-A9OX-01A-11R-A41O-07	1117.5	0	low	0.440074
TCGA-V1-A9OY-01A-11R-A41O-07	1051.5	0	low	0.451257
TCGA-V1-A9Z8-01A-11R-A41O-07	815.1	0	low	0.311671
TCGA-V1-A9Z9-01A-21R-A41O-07	532.2	0	low	0.397022
TCGA-V1-A9ZI-01A-11R-A41O-07	1616.4	0	low	0.36934
TCGA-V1-A9ZR-01A-11R-A41O-07	1341.3	0	low	0.408804
TCGA-VN-A88I-01A-11R-A352-07	265.2	0	low	0.440479
TCGA-VN-A88M-01A-11R-A352-07	186.3	0	low	0.420672
TCGA-VN-A88N-01A-11R-A36G-07	754.8	0	low	0.432376
TCGA-VN-A88Q-01A-11R-A352-07	1346.4	0	low	0.44516
TCGA-VN-A943-01A-11R-A41O-07	488.7	0	low	0.440968
TCGA-VP-A875-01A-31R-A352-07	2275.5	0	low	0.214566
TCGA-VP-A876-01A-11R-A352-07	3284.7	0	low	0.195806
TCGA-VP-A87B-01A-11R-A352-07	2437.2	1	low	0.311561
TCGA-VP-A87C-01A-11R-A352-07	1665.6	0	low	0.396033
TCGA-VP-A87D-01A-11R-A352-07	1176.6	1	low	0.358365
TCGA-VP-A87K-01A-11R-A352-07	687	1	low	0.324534
TCGA-WW-A8ZI-01A-11R-A37L-07	442.5	0	low	0.112614
TCGA-X4-A8KQ-01A-12R-A36G-07	1362.9	0	low	0.471548
TCGA-X4-A8KS-01A-12R-A36G-07	964.8	0	low	0.170319
TCGA-XJ-A83F-01A-11R-A352-07	1110.6	0	low	0.283221
TCGA-XJ-A9DI-01A-11R-A37L-07	1440	0	low	0.474983
TCGA-XJ-A9DQ-01A-11R-A37L-07	89.7	0	low	0.325868
TCGA-XJ-A9DX-01A-11R-A37L-07	958.8	0	low	0.22171
TCGA-XK-AAIR-01A-11R-A41O-07	957.9	0	low	0.328277
TCGA-XK-AAJ3-01A-11R-A41O-07	1243.8	0	low	0.275707
TCGA-XK-AAJA-01A-11R-A41O-07	916.5	0	low	0.475925
TCGA-XK-AAJP-01A-11R-A41O-07	1240.8	0	low	0.418028
TCGA-XK-AAK1-01A-11R-A41O-07	964.8	0	low	0.381363
TCGA-XQ-A8TB-01A-11R-A36G-07	759	0	low	0.322012
TCGA-Y6-A9XI-01A-11R-A41O-07	518.4	0	low	0.282218
TCGA-YL-A8HJ-01A-11R-A36G-07	1587.6	0	low	0.342687
TCGA-YL-A8S9-01A-11R-A37L-07	991.5	1	low	0.227244
TCGA-YL-A8SB-01A-31R-A37L-07	1364.1	1	low	0.320755
TCGA-YL-A8SI-01A-11R-A41O-07	1402.5	1	low	0.444132
TCGA-YL-A9WK-01A-11R-A37L-07	994.5	1	low	0.393495
TCGA-YL-A9WX-01A-21R-A41O-07	1484.1	1	low	0.434955
TCGA-ZG-A8QX-01A-11R-A37L-07	435.6	0	low	0.458355
TCGA-ZG-A8QZ-01A-11R-A37L-07	303.6	0	low	0.450211
TCGA-ZG-A9KY-01A-11R-A41O-07	128.1	0	low	0.306715
TCGA-ZG-A9L0-01A-11R-A41O-07	349.8	0	low	0.406062
TCGA-ZG-A9L5-01A-12R-A41O-07	894.9	0	low	0.220225
TCGA-ZG-A9L6-01A-11R-A41O-07	654.3	1	low	0.404366
TCGA-ZG-A9LM-01A-11R-A41O-07	372.6	0	low	0.421414
TCGA-ZG-A9LY-01A-11R-A41O-07	364.8	0	low	0.376503
TCGA-ZG-A9M4-01A-11R-A41O-07	539.1	0	low	0.202301
TCGA-ZG-A9NI-01A-11R-A41O-07	130.2	0	low	0.404354
TCGA-2A-A8VL-01A-21R-A37L-07	612	0	high	0.510379
TCGA-2A-A8W1-01A-11R-A37L-07	110.4	0	high	0.633507
TCGA-2A-A8W3-01A-11R-A37L-07	195	1	high	0.507196
TCGA-4L-AA1F-01A-11R-A41O-07	345	0	high	0.677233
TCGA-CH-5737-01A-11R-1580-07	89.7	0	high	0.59611
TCGA-CH-5743-01A-21R-1580-07	418.8	1	high	0.483856
TCGA-CH-5744-01A-11R-1580-07	59.1	0	high	0.644244
TCGA-CH-5745-01A-11R-1580-07	89.7	0	high	0.62249
TCGA-CH-5754-01A-11R-1580-07	61.2	0	high	0.821566
TCGA-CH-5761-01A-11R-1580-07	27.6	0	high	0.716667
TCGA-CH-5763-01A-11R-1580-07	359.7	0	high	0.50994
TCGA-CH-5767-01A-11R-1789-07	451.5	0	high	0.593654
TCGA-CH-5769-01A-11R-1580-07	61.2	0	high	0.793031
TCGA-CH-5771-01A-21R-1580-07	390.3	0	high	0.563429
TCGA-CH-5788-01A-11R-1580-07	809.1	0	high	0.688768
TCGA-CH-5789-01A-11R-1580-07	299.7	0	high	0.554158
TCGA-CH-5794-01A-11R-1580-07	869.4	0	high	0.610648
TCGA-EJ-5501-01A-01R-1580-07	1345.2	0	high	0.712489
TCGA-EJ-5510-01A-01R-1580-07	1859.7	0	high	0.498405
TCGA-EJ-5518-01A-01R-1580-07	2073.6	1	high	0.619246
TCGA-EJ-5519-01A-01R-1580-07	1933.5	0	high	0.492086
TCGA-EJ-5521-01A-01R-1580-07	2246.1	0	high	0.604063
TCGA-EJ-7125-01A-11R-1965-07	2808.9	0	high	0.540395
TCGA-EJ-7314-01A-31R-2118-07	1133.4	0	high	0.555467
TCGA-EJ-7330-01A-11R-2118-07	188.1	0	high	0.495692
TCGA-EJ-7791-01A-11R-2118-07	1101.9	0	high	0.560307
TCGA-EJ-A46E-01A-31R-A250-07	516.3	0	high	0.633838
TCGA-EJ-A46F-01A-31R-A250-07	211.8	1	high	0.548774
TCGA-EJ-A46H-01A-31R-A26U-07	713.4	0	high	0.632732
TCGA-EJ-A65B-01A-12R-A30B-07	699.6	0	high	0.621175
TCGA-EJ-A65D-01A-11R-A30B-07	387.3	0	high	0.606391
TCGA-EJ-A65M-01A-11R-A29R-07	226.8	0	high	0.587594
TCGA-EJ-A6RA-01A-11R-A33R-07	348	1	high	0.54603
TCGA-EJ-A7NG-01A-31R-A33R-07	425.7	0	high	0.550473
TCGA-EJ-A7NK-01A-12R-A352-07	469.2	0	high	0.488782
TCGA-EJ-A8FO-01A-21R-A36G-07	277.8	0	high	0.50766
TCGA-EJ-A8FU-01A-11R-A36G-07	135.9	0	high	0.506574
TCGA-EJ-AB27-01A-11R-A41O-07	142.8	0	high	0.704543
TCGA-FC-7708-01A-11R-2118-07	851.4	0	high	0.575245
TCGA-FC-A4JI-01A-11R-A250-07	864.3	0	high	1
TCGA-FC-A5OB-01A-11R-A29R-07	670.2	0	high	0.585449
TCGA-FC-A6HD-01A-11R-A31N-07	777.6	0	high	0.690677
TCGA-G9-6329-01A-13R-1965-07	1247.7	0	high	0.588902
TCGA-G9-6333-01A-12R-1965-07	2429.4	0	high	0.656081
TCGA-G9-6336-01A-11R-1789-07	2038.2	0	high	0.592462
TCGA-G9-6339-01A-12R-A311-07	1610.4	1	high	0.607626
TCGA-G9-6342-01A-11R-1965-07	1671.6	0	high	0.566746
TCGA-G9-6343-01A-21R-1965-07	2414.7	0	high	0.521198
TCGA-G9-6348-01A-11R-1789-07	1493.1	0	high	0.784119
TCGA-G9-6353-01A-11R-1965-07	1519.8	0	high	0.520514
TCGA-G9-6367-01A-11R-1789-07	1204.2	0	high	0.507133
TCGA-G9-6369-01A-21R-1965-07	1197.3	0	high	0.626557
TCGA-G9-6373-01A-11R-1789-07	799.2	0	high	0.567045
TCGA-G9-6377-01A-11R-1965-07	944.1	0	high	0.622906
TCGA-G9-6379-01A-11R-A31N-07	1752.3	0	high	0.53435
TCGA-G9-6384-01A-11R-1789-07	753.9	0	high	0.563896
TCGA-G9-6494-01A-11R-1789-07	1745.4	0	high	0.507018
TCGA-G9-6496-01A-11R-1789-07	1701	0	high	0.518562
TCGA-G9-6499-01A-12R-1965-07	1520.7	0	high	0.621152
TCGA-G9-7510-01A-11R-2263-07	1167.9	0	high	0.725424
TCGA-G9-7519-01A-11R-2263-07	836.7	0	high	0.552776
TCGA-G9-7521-01A-11R-2263-07	928.5	0	high	0.587057
TCGA-G9-7522-01A-11R-2263-07	1062.3	0	high	0.558796
TCGA-G9-7523-01A-11R-2263-07	844.5	0	high	0.698604
TCGA-G9-A9S0-01A-11R-A41O-07	640.5	1	high	0.713127
TCGA-G9-A9S4-01A-11R-A41O-07	892.8	0	high	0.556098
TCGA-HC-7209-01A-11R-2118-07	433.5	0	high	0.71636
TCGA-HC-7210-01A-11R-2118-07	855.6	0	high	0.632765
TCGA-HC-7211-01A-11R-2118-07	1203.3	0	high	0.525039
TCGA-HC-7213-01A-11R-2118-07	167.4	1	high	0.574742
TCGA-HC-7230-01A-11R-2118-07	986.4	0	high	0.539344
TCGA-HC-7736-01A-11R-2118-07	1087.2	0	high	0.770172
TCGA-HC-7737-01A-11R-2118-07	1074.3	0	high	0.799324
TCGA-HC-7740-01A-11R-2118-07	706.5	0	high	0.582798
TCGA-HC-7742-01A-11R-2118-07	924.3	0	high	0.584174
TCGA-HC-7750-01A-11R-2118-07	514.5	0	high	0.490634
TCGA-HC-7818-01A-11R-2118-07	924.3	0	high	0.57515
TCGA-HC-7819-01A-11R-2118-07	535.2	0	high	0.522955
TCGA-HC-8216-01A-11R-A29R-07	672	0	high	0.49341
TCGA-HC-A631-01A-11R-A29R-07	53.1	0	high	0.602937
TCGA-HC-A6AL-01A-11R-A30B-07	66	0	high	0.692946
TCGA-HC-A6AO-01A-11R-A30B-07	522.3	0	high	0.771156
TCGA-HC-A6AS-01A-11R-A30B-07	43.5	0	high	0.765502
TCGA-HC-A6HX-01A-11R-A31N-07	37.5	0	high	0.521179
TCGA-HC-A8D1-01A-11R-A36G-07	564.6	0	high	0.555874
TCGA-HC-A9TH-01A-11R-A41O-07	345.9	1	high	0.747712
TCGA-HI-7168-01A-11R-2118-07	2468.7	1	high	0.653156
TCGA-HI-7170-01A-11R-2118-07	2485.5	0	high	0.712139
TCGA-J4-A67L-01A-11R-A30B-07	759	0	high	0.605931
TCGA-J4-A67N-01A-11R-A30B-07	435.6	1	high	0.516548
TCGA-J4-A67O-01A-11R-A30B-07	826.8	0	high	0.681698
TCGA-J4-A67R-01A-21R-A30B-07	896.7	0	high	0.601345
TCGA-J4-A67T-01A-11R-A311-07	180.3	0	high	0.671276
TCGA-J4-A6G3-01A-11R-A311-07	609	1	high	0.704269
TCGA-J4-A83K-01A-11R-A352-07	323.4	0	high	0.495228
TCGA-J4-A83L-01A-11R-A352-07	709.5	0	high	0.608106
TCGA-J4-A83M-01A-11R-A352-07	513.6	1	high	0.492415
TCGA-J4-A83N-01A-11R-A352-07	426.6	1	high	0.623069
TCGA-J4-AATV-01A-11R-A41O-07	545.1	0	high	0.738844
TCGA-J4-AATZ-01A-11R-A41O-07	78	1	high	0.647319
TCGA-J4-AAU2-01A-11R-A41O-07	813	0	high	0.534023
TCGA-J9-A52B-01A-11R-A26U-07	56.1	1	high	0.603838
TCGA-J9-A52C-01A-11R-A26U-07	175.5	0	high	0.590881
TCGA-J9-A52E-01A-11R-A26U-07	318.3	0	high	0.646502
TCGA-J9-A8CK-01A-11R-A352-07	316.5	0	high	0.696027
TCGA-J9-A8CN-01A-11R-A352-07	1219.2	0	high	0.763194
TCGA-J9-A8CP-01A-11R-A352-07	380.4	0	high	0.541287
TCGA-KC-A4BL-01A-31R-A250-07	190.2	1	high	0.62119
TCGA-KC-A4BN-01A-61R-A250-07	1788.9	0	high	0.662305
TCGA-KC-A4BR-01A-32R-A32Y-07	1007.1	1	high	0.782316
TCGA-KC-A7F3-01A-21R-A33R-07	655.5	0	high	0.73155
TCGA-KC-A7F5-01A-11R-A33R-07	89.7	0	high	0.589655
TCGA-KC-A7FA-01A-21R-A33R-07	589.5	0	high	0.576987
TCGA-KK-A59X-01A-11R-A29R-07	2200.8	1	high	0.952066
TCGA-KK-A6E0-01A-11R-A311-07	927.3	1	high	0.719343
TCGA-KK-A6E1-01A-11R-A311-07	2166.3	0	high	0.771869
TCGA-KK-A6E3-01A-21R-A30B-07	2026.2	0	high	0.513797
TCGA-KK-A6E5-01A-11R-A311-07	2043	0	high	0.573165
TCGA-KK-A6E6-01A-11R-A311-07	3397.2	0	high	0.559885
TCGA-KK-A6E7-01A-11R-A31N-07	911.7	1	high	0.813113
TCGA-KK-A7AU-01A-11R-A32O-07	204	1	high	0.585123
TCGA-KK-A7AY-01A-11R-A33R-07	1107.9	1	high	0.534883
TCGA-KK-A7B1-01A-11R-A32O-07	1047.6	0	high	0.533234
TCGA-KK-A7B2-01A-12R-A32O-07	681.9	1	high	0.605194
TCGA-KK-A7B3-01A-11R-A33R-07	289.8	1	high	0.494571
TCGA-KK-A7B4-01A-11R-A32O-07	949.2	1	high	0.490787
TCGA-KK-A8I4-01A-11R-A36G-07	2130.6	1	high	0.528934
TCGA-KK-A8I5-01A-11R-A36G-07	3051.3	0	high	0.712782
TCGA-KK-A8I7-01A-21R-A36G-07	1730.7	1	high	0.574424
TCGA-KK-A8I9-01A-11R-A36G-07	926.4	1	high	0.693165
TCGA-KK-A8IB-01A-11R-A36G-07	81.9	0	high	0.783672
TCGA-KK-A8IC-01A-11R-A36G-07	1044.6	1	high	0.629772
TCGA-KK-A8ID-01A-11R-A36G-07	2076.6	0	high	0.620122
TCGA-KK-A8II-01A-11R-A36G-07	1827.3	1	high	0.636005
TCGA-KK-A8IJ-01A-11R-A352-07	302.7	1	high	0.617727
TCGA-M7-A71Z-01A-12R-A32O-07	633.6	0	high	0.619047
TCGA-M7-A720-01A-12R-A32O-07	378.3	0	high	0.543207
TCGA-M7-A721-01A-12R-A32O-07	394.2	0	high	0.48763
TCGA-M7-A722-01A-12R-A36G-07	550.8	1	high	0.533373
TCGA-M7-A723-01A-12R-A32O-07	752.1	0	high	0.662807
TCGA-M7-A724-01A-12R-A32O-07	876	0	high	0.851792
TCGA-M7-A725-01A-12R-A32O-07	564.6	0	high	0.604609
TCGA-MG-AAMC-01A-11R-A41O-07	170.4	0	high	0.601431
TCGA-QU-A6IL-01A-11R-A31N-07	95.7	0	high	0.607797
TCGA-QU-A6IM-01A-11R-A31N-07	1229.1	0	high	0.666818
TCGA-QU-A6IO-01A-11R-A31N-07	3662.4	0	high	0.567274
TCGA-SU-A7E7-01A-22R-A33R-07	543	0	high	0.570144
TCGA-V1-A8MG-01A-11R-A36G-07	844.5	0	high	0.486421
TCGA-V1-A8MK-01A-11R-A36G-07	500.7	0	high	0.520933
TCGA-V1-A8ML-01A-11R-A37L-07	441.6	0	high	0.593297
TCGA-V1-A8WL-01A-11R-A37L-07	1919.7	0	high	0.541255
TCGA-V1-A8WW-01A-11R-A37L-07	1062.3	0	high	0.734812
TCGA-V1-A9O5-01A-11R-A41O-07	122.1	1	high	0.618299
TCGA-V1-A9O7-01A-21R-A41O-07	807.3	1	high	0.746944
TCGA-V1-A9OH-01A-11R-A41O-07	2368.2	0	high	0.52427
TCGA-V1-A9OL-01A-11R-A41O-07	103.5	1	high	0.537402
TCGA-V1-A9Z7-01A-11R-A41O-07	861.3	0	high	0.526145
TCGA-V1-A9ZG-01A-11R-A41O-07	1495.2	0	high	0.68028
TCGA-V1-A9ZK-01A-11R-A41O-07	1362.9	0	high	0.502364
TCGA-VN-A88K-01A-11R-A352-07	764.7	0	high	0.590118
TCGA-VN-A88L-01A-11R-A352-07	735.3	0	high	0.554855
TCGA-VN-A88O-01A-11R-A352-07	474	0	high	0.775768
TCGA-VN-A88P-01A-11R-A352-07	1241.7	0	high	0.507087
TCGA-VN-A88R-01A-11R-A36G-07	504.6	1	high	0.690835
TCGA-VP-A872-01A-11R-A352-07	3578.4	0	high	0.599605
TCGA-VP-A878-01A-31R-A352-07	2319.9	1	high	0.538317
TCGA-VP-A87E-01A-31R-A352-07	2007.6	0	high	0.77759
TCGA-VP-A87H-01A-11R-A352-07	653.4	0	high	0.577813
TCGA-VP-A87J-01A-11R-A352-07	1748.4	0	high	0.642851
TCGA-VP-AA1N-01A-31R-A41O-07	1345.2	0	high	0.581406
TCGA-XA-A8JR-01A-11R-A36G-07	370.5	0	high	0.499373
TCGA-XJ-A83G-01A-11R-A352-07	1440	0	high	0.529734
TCGA-XJ-A83H-01A-11R-A352-07	1261.5	0	high	0.796805
TCGA-XJ-A9DK-01A-11R-A37L-07	270.9	0	high	0.504376
TCGA-XK-AAIV-01A-11R-A41O-07	1116.6	0	high	0.657343
TCGA-XK-AAIW-01A-11R-A41O-07	420.9	1	high	0.76924
TCGA-XK-AAJR-01A-11R-A41O-07	129	1	high	0.556368
TCGA-XK-AAJT-01A-11R-A41O-07	1413.3	0	high	0.523362
TCGA-XK-AAJU-01A-11R-A41O-07	1553.1	0	high	0.496057
TCGA-Y6-A8TL-01A-21R-A37L-07	977.7	0	high	0.529708
TCGA-YJ-A8SW-01A-11R-A37L-07	145.8	0	high	0.493771
TCGA-YL-A8HK-01A-11R-A36G-07	1356	1	high	0.596414
TCGA-YL-A8HL-01A-11R-A36G-07	1542.3	0	high	0.561618
TCGA-YL-A8HM-01A-11R-A36G-07	1451.7	1	high	0.563601
TCGA-YL-A8HO-01A-11R-A36G-07	1052.7	1	high	0.519743
TCGA-YL-A8S8-01A-11R-A37L-07	669.3	1	high	0.489933
TCGA-YL-A8SA-01A-21R-A37L-07	504.6	0	high	0.515789
TCGA-YL-A8SC-01A-11R-A37L-07	149.7	1	high	0.48821
TCGA-YL-A9WH-01A-11R-A37L-07	420.9	0	high	0.915139
TCGA-YL-A9WI-01A-11R-A37L-07	1599.6	0	high	0.489231
TCGA-YL-A9WJ-01A-11R-A37L-07	1454.7	1	high	0.593127
TCGA-YL-A9WL-01A-11R-A41O-07	729.3	1	high	0.491058
TCGA-YL-A9WY-01A-11R-A41O-07	960.9	1	high	0.501712
TCGA-ZG-A8QW-01A-11R-A37L-07	92.7	0	high	0.872082
TCGA-ZG-A8QY-01A-11R-A37L-07	398.1	0	high	0.596163
TCGA-ZG-A9L1-01A-11R-A41O-07	1283.1	0	high	0.634451
TCGA-ZG-A9L2-01A-31R-A41O-07	177.3	1	high	0.510674
TCGA-ZG-A9L4-01A-11R-A41O-07	1092	0	high	0.700173
TCGA-ZG-A9L9-01A-11R-A41O-07	50.4	1	high	0.743028
TCGA-ZG-A9LB-01A-11R-A41O-07	574.5	0	high	0.863759
TCGA-ZG-A9LN-01A-11R-A41O-07	113.4	0	high	0.576663
TCGA-ZG-A9LS-01A-12R-A41O-07	508.5	0	high	0.490442
TCGA-ZG-A9LU-01A-11R-A41O-07	570.6	0	high	0.720856
TCGA-ZG-A9LZ-01A-11R-A41O-07	681.9	0	high	0.756686
TCGA-ZG-A9MC-01A-31R-A41O-07	448.5	0	high	0.511629
TCGA-ZG-A9N3-01A-11R-A41O-07	344.1	0	high	0.780425
TCGA-ZG-A9ND-01A-11R-A41O-07	404.1	0	high	0.715328
